# Supplementary material for: Circulating Cell-Free DNA as Biomarker of Taxane Resistance in Metastatic Castration-Resistant Prostate Cancer
Source: MDPI journal article supplement (doi:10.3390/cancers13164055), 2021-08-12
Supplement: s1 [file s1]

Supplementary Materials

# Circulating Cell-Free DNA as Biomarker of Taxane Resistance in Metastatic Castration-Resistant Prostate Cancer

Edoardo Francini, Fang-Shu Ou, Justin Rhoades, Eric G. Wolfe, Edward P. O'Connor, Gavin Ha, Gregory Gydush, Kaitlin M. Kelleher, Rupal S. Bhatt, Steven P. Balk, Christopher J. Sweeney, Viktor A. Adalsteinsson, Mary-Ellen Taplin and Atish D. Choudhury

**Table S1.** Genes with the most significant and identical p-values.

| Docetaxel, Amplification (raw p-value*=0.048) |          |        | Cabazitaxel, Amplification (raw p-value*=0.019) |          |         |
|-----------------------------------------------|----------|--------|-------------------------------------------------|----------|---------|
| ACRC                                          | ITGB1BP2 | SLC7A3 | ARR3                                            | P2RY4    |         |
| CITED1                                        | MED12    | SNX12  | AWAT1                                           | PDZD11   |         |
| CXCR3                                         | NHSL2    | TAF1   | AWAT2                                           | RAB41    |         |
| CXorf65                                       | NLGN3    | ZMYM3  | DGAT2L6                                         | TEX11    |         |
| DMRTC1B                                       | NONO     |        | DLG3                                            |          |         |
| ERCC6L                                        | OGT      |        | EDA                                             |          |         |
| FOXO4                                         | PHKA1    |        | GDPD2                                           |          |         |
| GJB1                                          | PIN4     |        | IGBP1                                           |          |         |
| HDAC8                                         | RGAG4    |        | KIF4A                                           |          |         |
| IL2RG                                         | RPS4X    |        | OTUD6A                                          |          |         |
| Docetaxel, Deletion (raw p-value*=0.0085)     |          |        | Cabazitaxel, Deletion (raw p-value*=0.0077)     |          |         |
| ACMSD                                         | MGAT5    |        | AGBL4                                           | DMRTA2   | SLC5A9  |
| ANKRD30BL                                     | NCKAP5   |        | AL109659.1                                      | EFCAB14  | SPATA6  |
| CCNT2                                         | R3HDM1   |        | ATPAF1                                          | ELAVL4   | STIL    |
| CXCR4                                         | RAB3GAP1 |        | BEND5                                           | FLJ00388 | TAL1    |
| DARS                                          | TMEM163  |        | CMPK1                                           | FOXD2    | TEX38   |
| GPR39                                         | UBXN4    |        | CYP4A11                                         | FOXE3    | TRABD2B |
| LCT                                           | ZRANB3   |        | CYP4A22                                         | KNCN     |         |
| LYPD1                                         |          |        | CYP4B1                                          | MKNK1    |         |
| MAP3K19                                       |          |        | CYP4X1                                          | MOB3C    |         |
| MCM6                                          |          |        | CYP4Z1                                          | PDZK1IP1 |         |

\*: p-value was calculated using Firth's biased-reduced logistic regression prior to false discovery rate adjustment.
